# Supplementary material
Source: Springer Nature journal article supplement (https://www.springermedizin.de/resource/supplementary/12894_2014_349_MOESM1_ESM.pdf/9513576)
Supplement: MOESM1 [file 9513576]

POST-TREATMENT PSYCHO-SEXUAL ADJUSTMENT

Psycho-sexual Impact

Significant sexual and urinary difficulties

Tainted self-perception and identity

Altered intimate relationships

Communication and Support

Partner-patient

Other health professionals-patient

Other men with prostate cancer & support groups

Information and support needs

Integration Process

Lifestyle adjustments

Emotional struggle

Striving for acceptance & integration
